# Supplementary material
Source: HighWire-hosted journal article supplement (https://erj.ersjournals.com/content/55/1/1902217)
Supplement: inline-supplementary-material-1 [file inline-supplementary-material-1.pdf]

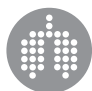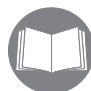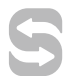

SHAREABLE PDF

# Looking at the COPD spectrum through “PRISm”

Amin Adibi and Mohsen Sadatsafavi 

**Affiliation:** Respiratory Evaluation Sciences Program, Collaboration for Outcomes Research and Evaluation, Faculty of Pharmaceutical Sciences, University of British Columbia, Vancouver, BC, Canada.

**Correspondence:** Mohsen Sadatsafavi, Faculty of Pharmaceutical Sciences, University of British Columbia, Vancouver, BC, Canada. E-mail: msafavi@mail.ubc.ca

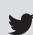

@ERSpublications

**Preserved ratio impaired spirometry (PRISm) is a prevalent, neglected condition whose prognosis is close to that of COPD** <http://bit.ly/2Oydvq1>

**Cite this article as:** Adibi A, Sadatsafavi M. Looking at the COPD spectrum through “PRISm”. *Eur Respir J* 2020; 55: 1902217 [<https://doi.org/10.1183/13993003.02217-2019>].

This single-page version can be shared freely online.

COPD is a major burden globally. According to the Global Burden of Disease study, COPD caused 3.2 million deaths in 2015, accounting for 5% of all deaths worldwide, making it the third leading cause of death in the world [1]. The Global Initiative for Chronic Obstructive Lung Disease (GOLD) defines spirometrically confirmed COPD based on a forced expiratory volume during the first second (FEV<sub>1</sub>) to a forced vital capacity (FVC) ratio smaller than 0.7 [2]. The severity of airflow obstruction is further defined through GOLD severity grades based on the ratio of FEV<sub>1</sub> to its predicted value, with GOLD 1, 2, 3 and 4 defined around cut-off points of 80%, 50%, and 30% [2].
